# Supplementary material for: The observation of high order overtones and combinations in the SERRS spectra of a perylene dye spin coated onto silver island films
Source: Royal Society of Chemistry journal article supplement (doi:10.1039/b804950e), 2008-01-01
Supplement: b804950e.pdf [file b804950e.pdf]

Supporting information

## The Observation of High Order Overtones and Combinations in the SERRS Spectra of a Perylene Dye Spin Coated onto Silver Island Films

Joel C. Rubim<sup>a,b</sup> and Ricardo F. Aroca<sup>a\*</sup>

<sup>a</sup> *Materials and Surface Science Group, Department of Chemistry and Biochemistry, University of Windsor*

<sup>b</sup> *On a sabbatical leave from the Laboratório de Materiais e Combustíveis do Instituto de Química da Universidade de Brasília, DF, Brazil*

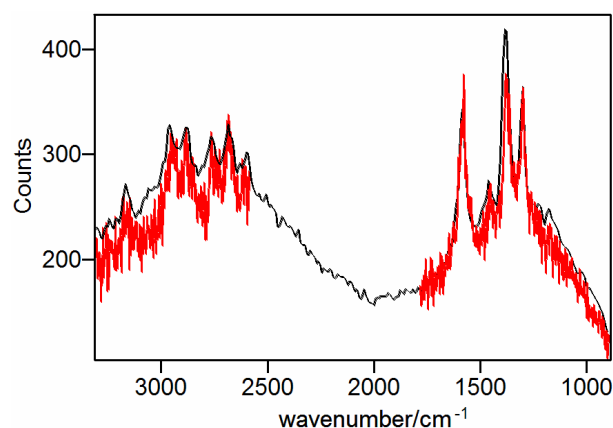

Figure 1S. SERRS of an Ag island film exposed (spin coating) to a 50  $\mu\text{L}$  of C/PTCD solution  $8.7 \times 10^{-7}$   $\text{mol.L}^{-1}$ . The spectra were excited at 514.5 nm ( $2 \mu\text{W}$  at the sample). The spectrum in black was recorded first, at the scanning mode as in Figure 5. The spectra in red were recorded at the static mode at the same position at the surface.

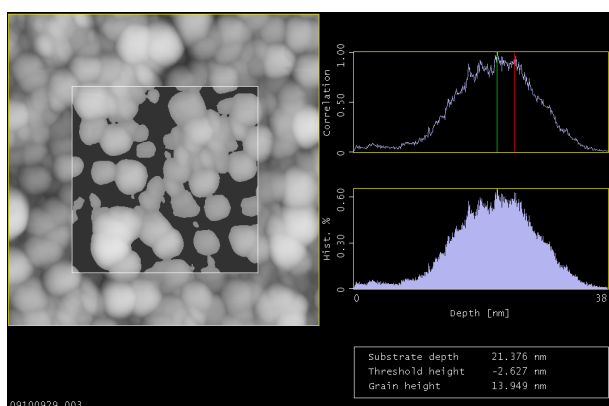

Figure 2S. Histogram of the Ag particles of the AFM image of Figure 3.

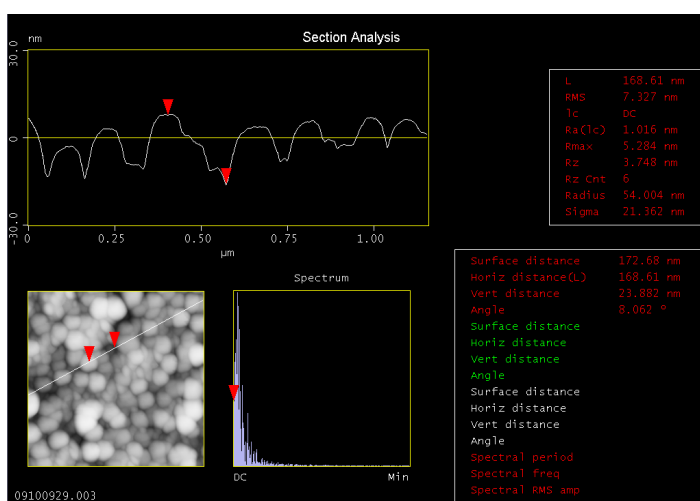

Figure 3S. Z profile of the Ag island film corresponding to the AFM image of Figure 3.
